# Supplementary material for: Electrochemical synthesis of organochalcogenides in aqueous medium
Source: Royal Society of Chemistry journal article supplement (doi:10.1039/c5gc01869b), 2015-09-01
Supplement: c5gc01869b1.pdf [file c5gc01869b1.pdf]

## Electronic Supplementary Information

### Electrochemical Synthesis of Organochalcogenides in Aqueous Medium

Pedro B. R. Neto,<sup>a</sup> Sonydelane O. Santana,<sup>a</sup> Guillaume Levitre,<sup>b</sup> Danilo Galdino,<sup>a</sup> Jadson L. Oliveira,<sup>a</sup> Rogério T. Ribeiro,<sup>a</sup> Maria E. S. B. Barros,<sup>a</sup> Lothar W. Bieber,<sup>a</sup> Paulo H. Menezes<sup>a</sup> and Marcelo Navarro<sup>a\*\*†</sup>

#### 1. General Remarks

##### 1.1. Materials

Tetrahydrofuran (THF) and ethyl acetate were previously purified in agreement with the literature.<sup>1</sup> Tellurium, selenium and sulfur powder ( $\geq 99.5\%$ ) were purchased from Aldrich and used as received. All other commercially available reagents and solvents were used as received. Reactions were monitored by gas chromatography. The products were characterized by GC/MS and NMR. The isolated product rate, mono- and dichalcogen, was determined by gas chromatography.

##### 1.2. Instrumentation

Controlled-current electrolyses were carried out using Autolab PGSTAT 30 potentiostat/galvanostat or a DC power source, in a two compartment electrochemical cell (Figure 1). Isolated products were determined by GC (Varian CP-3380; Chrompack CP-SPL5CB capillary column 30 m; initial temperature 60 °C then increased to 220°C at 10°C min<sup>-1</sup>), GC/MS (Agilent 5975C), <sup>1</sup>H NMR (400 MHz) and <sup>13</sup>C NMR data (100 MHz) were recorded in CDCl<sub>3</sub>. The chemical shifts are reported as delta ( $\delta$ ) units in parts per million (ppm) relative to the solvent residual peak as the internal reference. Coupling constants ( $J$ ) for all spectra are reported in Hertz (Hz). <sup>125</sup>Te NMR (95 MHz) was obtained using diphenylditellane as external reference ( $\delta$  422.0), spectral window equal to 64.4 kHz, acquisition time equal to 0.64 s, 64 repetitions, RF pulse of 45° and line broadening equal to 5.0 Hz.

---

<sup>1</sup> D.D. Perrin, W.L.F. Armarego, Purification of Laboratory Chemicals, Pergamon, Oxford, **1980**.

### 1.3. Representative Procedure for the Synthesis of dicyclopentyltellane (2j)

Tellurium powder (0.5 mmol, 63.8 mg) and 0.2 mol L<sup>-1</sup> NaOH solution (25 mL) were added to the electrochemical cell (Figure 1). A stainless steel grid cathode and anode were used as electrodes with the anodic compartment separated by Nafion<sup>®</sup>. The system was subjected to constant current (I = -70 mA) electrolysis, under intense argon atmosphere. After the consumption of the Te<sup>0</sup>, the solution becomes purple, and then colorless, which determines the end point of the electroreduction.<sup>2</sup> 20 mL of co-solvent (THF) was added and the current maintained till the solution (H<sub>2</sub>O/THF) becomes colorless again. The current was stopped and bromocyclopentane (150 mg, 102 μL, 1.0 mmol) dissolved in THF (5 mL) (deaerated with argon) was added via syringe to the electrochemical cell. The reaction was stirred for 12 hours at room temperature under argon. After this period the reaction was diluted with ethyl acetate (20 mL) and washed with water (2 x 30 mL). The organic layer was separated, dried over NaSO<sub>4</sub> and filtered. The solvent was removed under reduced pressure to yield 96.3 mg (72%) of the title compound without the need of further purification. <sup>1</sup>H NMR (400 MHz, CDCl<sub>3</sub>) δ 3.55 (qui, J = 6.5 Hz, 2H); 2.06-1.98 (m, 8H); 1.75-1.57 (m, 8H); <sup>13</sup>C NMR (100 MHz, CDCl<sub>3</sub>) δ 38.0; 25.4; 17.9; <sup>125</sup>Te NMR (95 MHz, CDCl<sub>3</sub>). δ 211.4. C<sub>10</sub>H<sub>18</sub>Te: LRMS (EI) m/z (rel. int.) 268 ([M<sup>+</sup>], 7), 199 (C<sub>5</sub>H<sub>10</sub>Te, 7), 41 (C<sub>3</sub>H<sub>5</sub>, 28).

---

<sup>2</sup> (a) R. T. Ribeiro, J. M. M. Dias, G. A. G. Pereira, D. V. Freitas, P. E. Cabral Filho, R. A. Raelle, A. Fontes, M. Navarro and B. S. Santos, *Green Chem.* 2013, **15**, 1061-1066 (b) D. V. Freitas, J. M. M. Dias, S. G. B. Passos, G. C. S. de Souza, E. T. Neto and M. Navarro, *Green Chem.*, 2014, **16**, 3247-3254.

N0611\_2

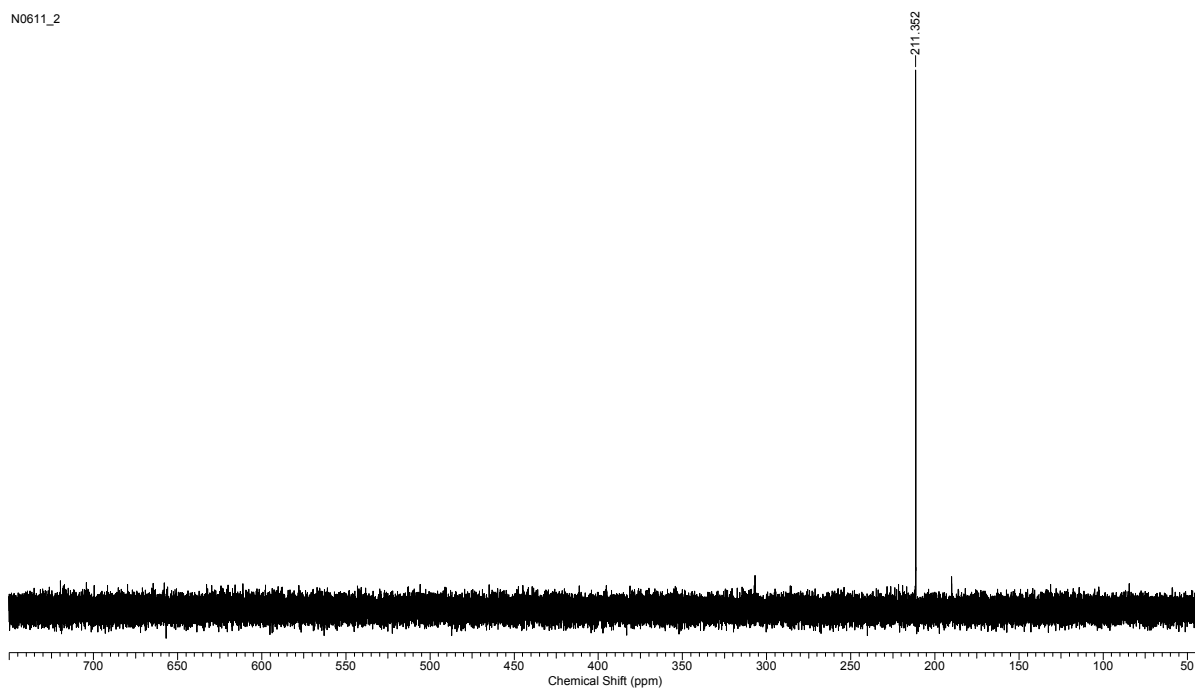

$^{125}\text{Te}$  NMR spectrum (95 MHz,  $\text{CDCl}_3$ ) of compound **2j**

N0611\_2

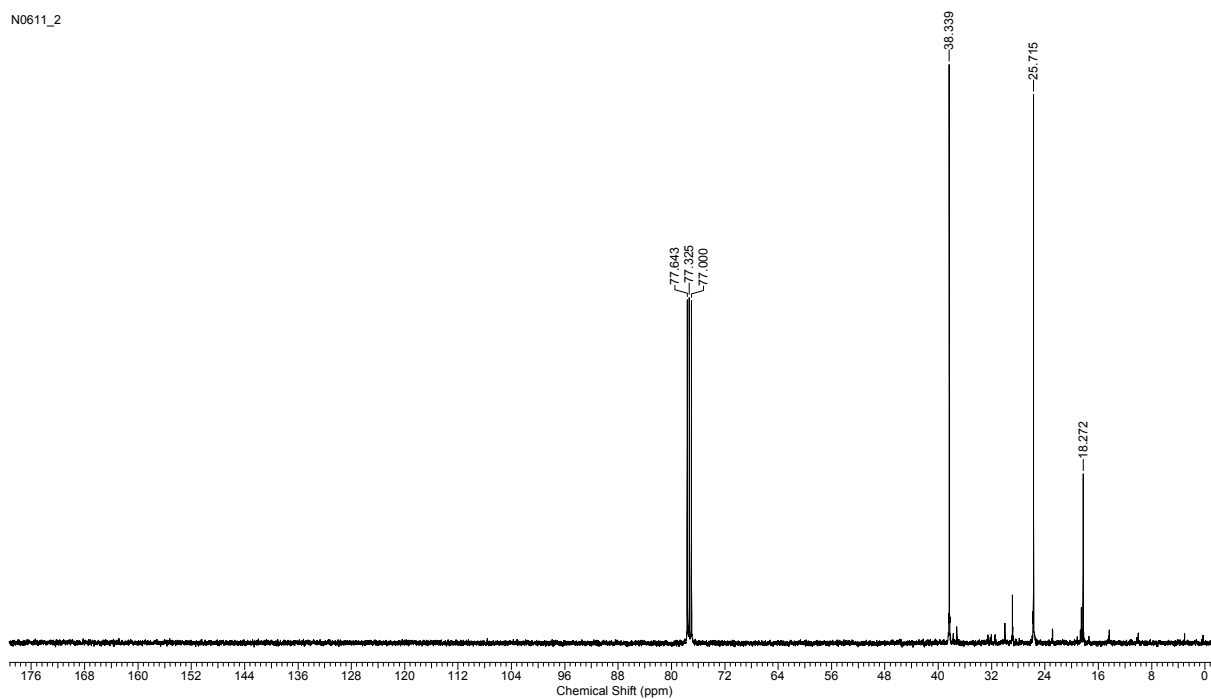

$^{13}\text{C}$  NMR spectrum (100 MHz,  $\text{CDCl}_3$ ) of compound **2j**

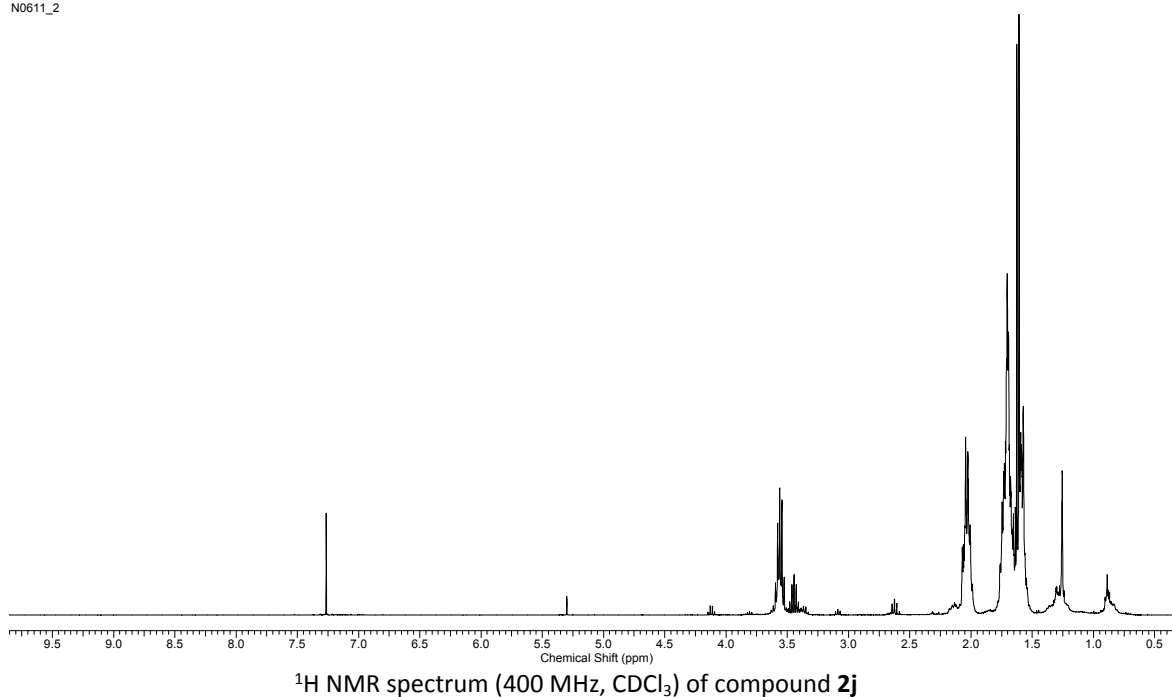

#### 1.4 Characterization of products

**Dipentyltellane (2a) [71475-88-2]** C<sub>10</sub>H<sub>22</sub>Te: LRMS (EI) *m/z* (rel. int.) 272 ([M<sup>+</sup>], 26), 270 ([M<sup>+</sup>] - 2, 24), 268 ([M<sup>+</sup>] - 4, 16), 202 (C<sub>5</sub>H<sub>12</sub>Te<sup>+</sup>, 15), 200 ([C<sub>5</sub>H<sub>12</sub>Te<sup>+</sup>] - 2, 15), 71 (C<sub>5</sub>H<sub>11</sub><sup>+</sup>, 99), 43 (C<sub>3</sub>H<sub>7</sub><sup>+</sup>, 100). The data match to the previously described compound.<sup>3</sup>

**Dipentylselenide (2b) [14835-67-7]** C<sub>10</sub>H<sub>22</sub>Se: LRMS (EI) *m/z* (rel. int.) 222 ([M<sup>+</sup>], 46), 220 ([M<sup>+</sup>] - 2, 23), 152 (C<sub>5</sub>H<sub>12</sub>Se<sup>+</sup>, 55), 71 (C<sub>5</sub>H<sub>11</sub><sup>+</sup>, 100), 43 (C<sub>3</sub>H<sub>7</sub><sup>+</sup>, 82). The data match to the previously described compound.<sup>4</sup>

**Dipentyldiselenide (3b) [52056-07-2]** C<sub>10</sub>H<sub>22</sub>Se<sub>2</sub>: LRMS (EI) *m/z* (rel. int.) 302 ([M<sup>+</sup>], 18), 300 ([M<sup>+</sup>] - 2, 17), 232 (C<sub>5</sub>H<sub>12</sub>Se<sub>2</sub><sup>+</sup>, 19), 230 ([C<sub>5</sub>H<sub>12</sub>Se<sub>2</sub><sup>+</sup>] - 2, 17), 71 (C<sub>5</sub>H<sub>11</sub><sup>+</sup>, 92), 43 (C<sub>3</sub>H<sub>7</sub><sup>+</sup>, 100). The data match to the previously described compound.<sup>4</sup>

**Dipentylsulfide (2c) [872-10-6]** C<sub>10</sub>H<sub>22</sub>S: LRMS (EI) *m/z* (rel. int.) 174 ([M<sup>+</sup>], 51), 103 (C<sub>5</sub>H<sub>11</sub>S<sup>+</sup>, 86), 71 (C<sub>5</sub>H<sub>11</sub><sup>+</sup>, 100), 43 (C<sub>3</sub>H<sub>7</sub><sup>+</sup>, 40). The data match to the previously described compound.<sup>5</sup>

**Dipentyldisulfide (3c) [112-51-6]** C<sub>10</sub>H<sub>22</sub>S<sub>2</sub>: LRMS (EI) *m/z* (rel. int.) 206 ([M<sup>+</sup>], 67), 136 (C<sub>5</sub>H<sub>12</sub>S<sub>2</sub><sup>+</sup>, 51), 103 (C<sub>5</sub>H<sub>11</sub>S<sup>+</sup>, 21), 71 (C<sub>5</sub>H<sub>11</sub><sup>+</sup>, 75), 43 (C<sub>3</sub>H<sub>7</sub><sup>+</sup>, 100). The data match to the previously described compound.<sup>6</sup>

<sup>3</sup> P. Lue; B-C. Chen; X-W. Yu; J. Chen and X-J. Zhou; *Synth. Commun.* 1986, **16**, 1849-1854.

<sup>4</sup> J. A. Gladysz, J. L. Hornby and J. E. Garbe. *J. Org. Chem.*, 1978, **43**, 1204-1208.

<sup>5</sup> G-P. Lu and C. Cai; *Green Chem. Lett. Rev.* 2012, **5**, 481-485.

**Dihexyltellane (2d) [158734-99-7]** C<sub>12</sub>H<sub>26</sub>Te, LRMS (EI) *m/z* (rel. int.) 300 ([M<sup>+</sup>], 18), 298 ([M<sup>+</sup>] - 2, 16), 296 ([M<sup>+</sup>] - 4, 10), 216 (C<sub>6</sub>H<sub>14</sub>Te<sup>+</sup>, 11), 85 (C<sub>6</sub>H<sub>13</sub><sup>+</sup>, 62), 43 (C<sub>3</sub>H<sub>7</sub><sup>+</sup>, 100). The data match to the previously described compound.<sup>7</sup>

**Dihexylselenide (2e) [7732-99-2]** C<sub>12</sub>H<sub>26</sub>Se, LRMS (EI) *m/z* (rel. int.) 250 ([M<sup>+</sup>], 60), 248 ([M<sup>+</sup>] - 2, 30), 165 (C<sub>6</sub>H<sub>13</sub>Se<sup>+</sup>, 71), 85 (C<sub>6</sub>H<sub>13</sub><sup>+</sup>, 93), 43 (C<sub>3</sub>H<sub>7</sub><sup>+</sup>, 100). The data match to the previously described compound.<sup>8</sup>

**Dihexyldiselenide (3e) [52056-08-3]** C<sub>12</sub>H<sub>26</sub>Se<sub>2</sub>, LRMS (EI) *m/z* (rel. int.) 330 ([M<sup>+</sup>], 15), 328 ([M<sup>+</sup>] - 2, 13), 245 (C<sub>6</sub>H<sub>14</sub>Se<sub>2</sub><sup>+</sup>, 16), 85 (C<sub>6</sub>H<sub>13</sub><sup>+</sup>, 66), 43 (C<sub>3</sub>H<sub>7</sub><sup>+</sup>, 100). The data match to the previously described compound.<sup>9</sup>

**Dihexylsulfide (2f) [6294-31-1]** C<sub>12</sub>H<sub>26</sub>S, LRMS (EI) *m/z* (rel. int.) 202 ([M<sup>+</sup>], 35), 117 (C<sub>6</sub>H<sub>13</sub>S<sup>+</sup>, 100), 85 (C<sub>6</sub>H<sub>13</sub><sup>+</sup>, 55), 59 (C<sub>4</sub>H<sub>9</sub><sup>+</sup>, 38), 43 (C<sub>3</sub>H<sub>7</sub><sup>+</sup>, 35). The data match to the previously described compound.<sup>10</sup>

**Dihexyldisulfide (3f) [10496-15-8]** C<sub>12</sub>H<sub>26</sub>S<sub>2</sub>, LRMS (EI) *m/z* (rel. int.) 234 ([M<sup>+</sup>], 56), 150 (C<sub>6</sub>H<sub>14</sub>S<sub>2</sub><sup>+</sup>, 47), 117 (C<sub>6</sub>H<sub>13</sub>S<sup>+</sup>, 21), 85 (C<sub>6</sub>H<sub>13</sub><sup>+</sup>, 53), 43 (C<sub>3</sub>H<sub>7</sub><sup>+</sup>, 100). The data match to the previously described compound.<sup>11</sup>

**Dicyclopentylselenide (2k) [136397-83-6]** C<sub>10</sub>H<sub>18</sub>Se, LRMS (EI) *m/z* (rel. int.) 218 ([M<sup>+</sup>], 13), 149 (C<sub>5</sub>H<sub>10</sub>Se<sup>+</sup>, 15), 69 (C<sub>5</sub>H<sub>9</sub><sup>+</sup>, 100), 41 (C<sub>3</sub>H<sub>5</sub><sup>+</sup>, 26). The data match to the previously described compound.<sup>12</sup>

**Dicyclopentylselenide (3k) [62212-26-4]** C<sub>10</sub>H<sub>18</sub>Se<sub>2</sub>, LRMS (EI) *m/z* (rel. int.) 298 ([M<sup>+</sup>], 10), 296 ([M<sup>+</sup>] - 2, 9), 230 (C<sub>5</sub>H<sub>10</sub>Se<sub>2</sub><sup>+</sup>, 11), 228 ([C<sub>5</sub>H<sub>10</sub>Se<sub>2</sub><sup>+</sup>] - 2, 10), 69 (C<sub>5</sub>H<sub>9</sub><sup>+</sup>, 100), 41 (C<sub>3</sub>H<sub>5</sub><sup>+</sup>, 33). The data match to the previously described compound.<sup>13</sup>

**Dicyclopentylsulfide (2l) [1126-65-4]** C<sub>10</sub>H<sub>18</sub>S, LRMS (EI) *m/z* (rel. int.) 170 ([M<sup>+</sup>], 26), 101 (C<sub>5</sub>H<sub>9</sub>S<sup>+</sup>, 73), 69 (C<sub>5</sub>H<sub>9</sub><sup>+</sup>, 100), 41 (C<sub>3</sub>H<sub>5</sub><sup>+</sup>, 76). The data match to the previously described compound.<sup>14</sup>

---

<sup>6</sup> A. Baker; M. Graz, R. Saunders; G.J.S. Evans; S. Kaul and T. Wirth. *J. Flow Chem.* 2013, **3**, 118–121.

<sup>7</sup> T.S. Butcher; F. Zhou and Michael R. Detty. *J. Org. Chem.* 1998, **63**, 169-176.

<sup>8</sup> A. Krief and M. Derock; *Tetrahedron Lett.* 2002, **43**, 3083–3086.

<sup>9</sup> Z-Z. Huang; F-Y. Liu; J-X; Du and X. Huang. *Oppi Briefs*, 1995, **27**, 492-494.

<sup>10</sup> N. Sidiq, M.A. Bhat, K.Z. Khan and M.A. Khuroo. *Heteroatom Chem.*, 2012, **23**, 373-376.

<sup>11</sup> D. Chauhan, P. Kumar, C. Joshi, N. Labhsetwar, S. K. Gangulya and S. L. Jain. *New J. Chem.*, 2015, **39**, 6193-6200.

<sup>12</sup> M. Sekiguchi, H. Tanaka, N. Takami, A. Ogawa,; I. Ryu and N. Sonoda. *Heteroatom Chem.*, 1991, **2**, 427-430.

<sup>13</sup> Y. Nishiyama, S. Hamanaka, A. Ogawa, S. Murai and N. Sonoda. *Synth. Commun.*, 1986, **16**, 1059-1066.

<sup>14</sup> I. Akhrem, A. Orlinikov and Sergei Vitt. *Inorg. Chim. Acta* 1998, **280**, 355-359.

**Dicyclopentyldisulfide (3l) [4485-78-3]** C<sub>10</sub>H<sub>18</sub>S<sub>2</sub>, LRMS (EI) *m/z* (rel. int.) 202 ([M<sup>+</sup>], 24), 134 (C<sub>5</sub>H<sub>10</sub>S<sub>2</sub><sup>+</sup>, 39), 69 (C<sub>5</sub>H<sub>9</sub><sup>+</sup>, 100), 41 (C<sub>3</sub>H<sub>5</sub><sup>+</sup>, 27). The data match to the previously described compound.<sup>15</sup>

**Dibenzyltellane (2m) [62654-03-9]** C<sub>14</sub>H<sub>14</sub>Te, LRMS (EI) *m/z* (rel. int.) 312 ([M<sup>+</sup>], 5), 310 ([M<sup>+</sup>] - 2, 4), 308 ([M<sup>+</sup>] - 4, 2), 91 (C<sub>7</sub>H<sub>7</sub><sup>+</sup>, 100), 65 (C<sub>5</sub>H<sub>5</sub><sup>+</sup>, 12). The data match to the previously described compound.<sup>16</sup>

**Dibenzylselenide (2n) [1842-38-2]** C<sub>14</sub>H<sub>14</sub>Se, LRMS (EI) *m/z* (rel. int.) 262 ([M<sup>+</sup>], 19), 260 ([M<sup>+</sup>] - 2, 9), 91 (C<sub>7</sub>H<sub>7</sub><sup>+</sup>, 100), 65 (C<sub>5</sub>H<sub>5</sub><sup>+</sup>, 15). The data match to the previously described compound.<sup>17</sup>

**Dibenzylsulfide (2o) [538-74-9]** C<sub>14</sub>H<sub>14</sub>S, LRMS (EI) *m/z* (rel. int.) 214 ([M<sup>+</sup>], 41), 123 (C<sub>7</sub>H<sub>7</sub>S<sup>+</sup>, 35), 91 (C<sub>7</sub>H<sub>7</sub><sup>+</sup>, 100), 65 (C<sub>5</sub>H<sub>5</sub><sup>+</sup>, 11). The data match to the previously described compound. The data match to the previously described compound.<sup>18</sup>

**Dibenzylsulfide (3o) [150-60-7]** C<sub>14</sub>H<sub>14</sub>S<sub>2</sub>, LRMS (EI) *m/z* (rel. int.) 246 ([M<sup>+</sup>], 5), 181 (C<sub>9</sub>H<sub>9</sub>S<sub>2</sub><sup>+</sup>, 7), 91 (C<sub>7</sub>H<sub>7</sub><sup>+</sup>, 100), 65 (C<sub>5</sub>H<sub>5</sub><sup>+</sup>, 12).<sup>15</sup>

---

<sup>15</sup> M. Abbasi, M. R. Mohammadizadeh, H. Moosavi and N.G. Saeedia, *Synlett*, 2015, **26**, 1185–1190.

<sup>16</sup> H.K. Spencer and M.P. Cava. *J. Org. Chem.*, 1977, **42**, 2937-2939.

<sup>17</sup> V.P. Reddy, A.V. Kumar and K.R. Rao. *J. Org. Chem.* 2010, **75**, 8720–8723.

<sup>18</sup> B.W. Yoo, B.R. Yu and C.M. Yoon. *J. Sulfur Chem.*, 2015, **36**, 358–363.
